# Supplementary material
Source: Springer Nature journal article supplement (https://www.springermedizin.de/resource/supplementary/12874_2009_435_MOESM5_ESM.pdf/9432092)

Tertiary NSW

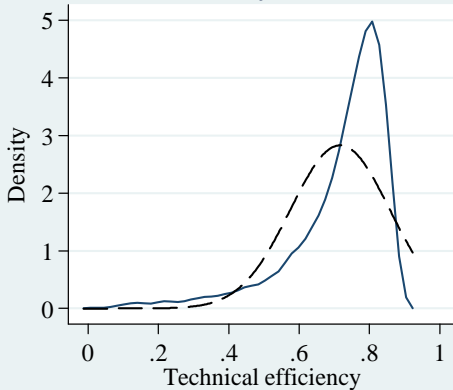

Tertiary SA

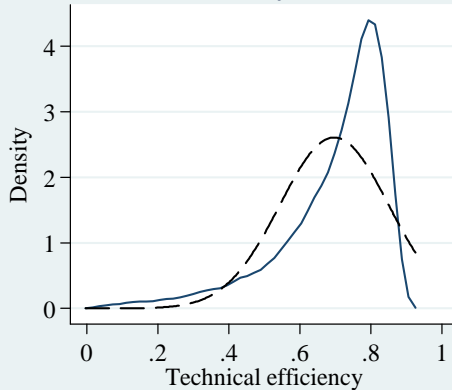

Tertiary VIC

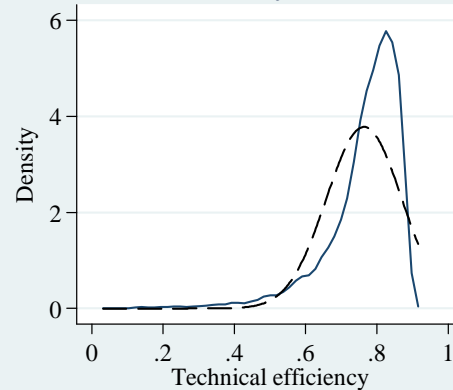

Tertiary NZ

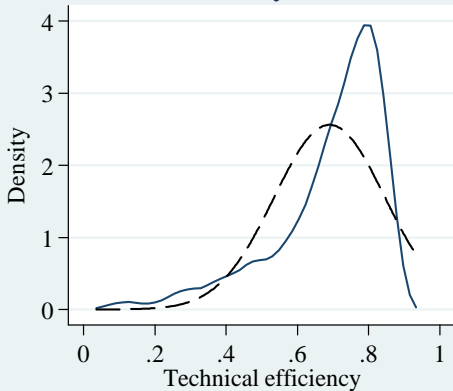

Tertiary QLD

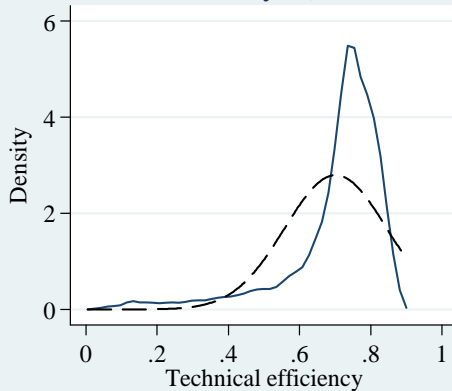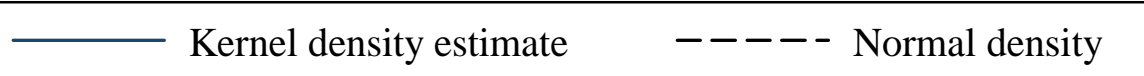

Supplement: MOESM5 [file 9432092]
